# Supplementary material for: Knowledge and perceptions of cardiopulmonary resuscitation amongst New Zealand podiatrists: a web‐based survey
Source: Springer Nature journal article supplement (doi:10.1186/s13047-021-00481-9), 2021-01-01
Supplement: MOESM1 [file 19164688]

## Survey

### Introduction

Hello and welcome to this survey exploring the knowledge, attitude and practice of cardiopulmonary resuscitation (CPR) among New Zealand podiatrists. The survey contains questions about your current knowledge of CPR and your attitude about how and when you would use CPR.

The survey will take approximately 5-10 minutes to complete. Please make sure you answer all the questions.

There are three sections: demographics, CPR practice/attitude and CPR knowledge.

Please read each question carefully and click the appropriate box (tick one box only per question).

1. Sex?

- Male  
 Female

2. Age?

- 20-29                       50-59  
 30-39                       60+  
 40-49

3. Years of podiatry experience?

- 0-5                               11-15  
 6-10                            16+

4. Postgraduate qualification?

- Yes  
 No

5. Current employment status?

- Employed                       Employer  
 Self-employed                 Other

6. Main work setting

Private practice

Public hospital/clinic

Community

University

Other

## **CPR practice/attitude**

**Please read each question carefully and click the appropriate box (tick one box only per question).**

7. When was your last formal CPR resuscitation training?

<3 months

1-2 years

3-12 months

2+ years

8. Did your last CPR training include automated external defibrillator (AED) training?

Yes

No

9. Did your last CPR training include anaphylaxis management?

Yes

No

10. Did your last CPR training involve practical face-to-face teaching?

Yes

No

11. In relation to your main place of work, do you know where your nearest AED is located?

Yes

No

12. Have you ever used CPR in an emergency?

Yes

No

13. If you have ever used CPR (or the last time you use it), did the patient survive?

Yes

Don't know

No

Not applicable

14. What do you believe the survival rate of patients is, for out of hospital cardiac arrest?

0-25%

51-75

26-50

76-100%

15. How would you rate your current CPR ability?

Not at all effective

Very effective

Not so effective

Extremely effective

Somewhat effective

16. I would feel unsure of how to react at work, if I was presented with an emergency situation requiring CPR:

Strongly disagree

Agree

Disagree

Strongly agree

Neither agree nor disagree

17. At work, I would consider it my duty to intervene in an emergency situation and perform CPR:

Strongly disagree

Agree

Disagree

Strongly agree

Neither agree nor disagree

18. I feel unsure of how to react if I was presented with an emergency situation in public (outside of work) requiring CPR:

Strongly disagree

Agree

Disagree

Strongly agree

Neither agree nor disagree

19. I would need gloves, face mask and other items relevant to self-protection to perform CPR:

Strongly disagree

Agree

Disagree

Strongly agree

Neither agree nor disagree

20. I would prefer not to perform mouth to mouth ventilation during CPR:

Strongly disagree

Agree

Disagree

Strongly agree

Neither agree nor disagree

## **CPR knowledge**

**Please read each question carefully and click the appropriate box.**

21. The compression rate during CPR is 80-100 per minute

True

False

22. Each rescue breath during CPR should be given over a 1 second period

True

False

23. If alone with an adult patient, go for help before starting CPR

True

False

24. Stop CPR if the patient has not recovered after 15-20 minutes of resuscitation

True

False

25. The AED will advise a shock for all cardiac arrest patients

True

False

26. Take no longer than 10 seconds to check for breathing when assessing an unresponsive patient

True

False

27. Reassess the patient after every two minutes of CPR to see if they have recovered

True

False

28. The AED can be used on infants and children under 8 years of age

True

False

29. The first step at the scene of a medical emergency is to check if the patient is responsive

True

False

30. The correct ratio of compression to ventilations on an adult patient during CPR is 30:2

True

False

31. The recommended compression depth for adults during CPR is >5cm

True

False
